# Supplementary material for: Mice harboring pathobiont-free microbiota do not develop intestinal inflammation that normally results from an innate immune deficiency
Source: PubMed Central journal article supplement (PMC5884553; doi:10.1371/journal.pone.0195310), 2018-04-04
Supplement: pone.0195310.s003.pdf [file pone.0195310.s003.pdf]

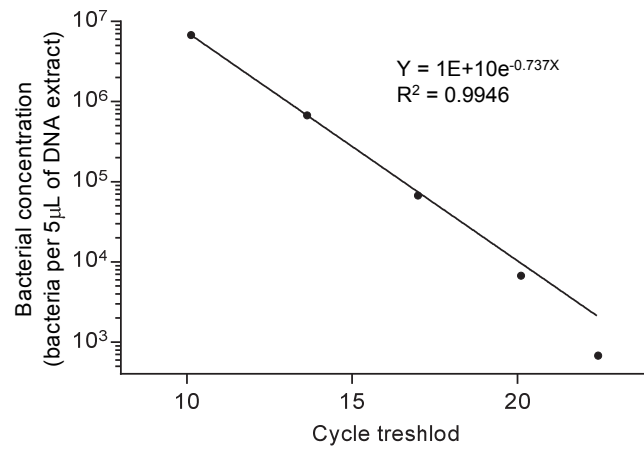

Chassaing et al., Figure S3.
